# Supplementary material for: Chemical Characterization of the Indoor Air Quality of a University Hospital: Penetration of Outdoor Air Pollutants
Source: Int J Environ Res Public Health. 2017 May 8;14(5):497. doi: 10.3390/ijerph14050497 (PMC5451948; doi:10.3390/ijerph14050497)
Supplement: Supplementary file 1 [file ijerph-14-00497-s001.pdf]

# Supplementary Materials: Chemical Characterization of the Indoor Air Quality of a University Hospital: Penetration of Outdoor Air Pollutants

Paul T.J. Scheepers \*, Luuk Van Wel, Gwendolyn Beckmann and Rob B.M. Anzion

For this study we performed simultaneous air measurements on different indoor and outdoor locations on the university hospital campus, using active sampling of the gas phase and particle phase. The gas phase was analyzed for volatile organic compounds (VOC) and for acrolein and formaldehyde. The particle matter (PM) measurements focused on the respirable particle fraction (PM-4.0) with some limited additional measurements of PM-2.5. Loaded filters were analyzed for benz[a]pyrene (B[a]P) to verify a potential origin related to combustion sources. In addition, we placed diffusive samplers for nitrogen dioxide and we performed wipe sampling of windows to check for potential soiling by soot, supported by an analysis for B[a]P. The study was performed over two subsequent periods of 7 days in March and the 1st of April in 2014. All air sampling was performed continuously (day and night) over a seven-day-period with two exceptions: the window soiling was evaluated over a period of four weeks and the sampling of NO<sub>2</sub> was performed over an uninterrupted period of two weeks. For comparison we included two older buildings on the university campus (kindergarten and an education building) as a reference. We also included a limited characterization of known outdoor sources of air pollution, i.e. the helicopter and an emergency power supply unit. For characterization of these known sources we analyzed the fuels and also performed source measurements in open air at short distances downwind of these sources. To support interpretation of reported odor complaints, we asked some employees to collect grab samples using a canister when an unusual smell was detected. We also used canisters to collect air samples to verify how diesel engine emissions could influence the IAQ in the building adjacent to the exhaust of the emergency power supply during test runs. More technical details of the used measurement methodology are provided in Tables S1-S8 and Figures S1-S6, see below.

**Table S1.** Overview of the registered complaints.

| Building no. | Floor | Date      | Department              | Key words in used description |              |          |               | Remark                      |
|--------------|-------|-----------|-------------------------|-------------------------------|--------------|----------|---------------|-----------------------------|
|              |       |           |                         | 'Kerosene' <sup>a</sup>       | 'Helicopter' | 'Diesel' | Other         |                             |
| M320         | 5     | 4-2-2011  | Genetics                | +                             |              |          |               |                             |
| M320         | 5     | 7-2-2011  | Genetics                | +                             |              |          |               |                             |
| M320         | 5     | 6-1-2012  | Genetics                | +                             | +            |          | Smoke         |                             |
| M320         | 3     | 9-2-2012  | Pathology               | +                             |              |          |               | Persistent smell            |
| M325         | -1    | 9-2-2012  | Obstetrics              | +                             | +            | +        |               |                             |
| M330         | 0     | 30-7-2012 | Emergency room          | +                             | +            |          |               |                             |
| M850         | -1    | 20-8-2012 | APO                     | +                             | +            |          |               |                             |
| M320         | 4     | 31-8-2012 | Pathology               | +                             | +            |          |               |                             |
| M325         | 2     | 31-8-2012 | Pediatrics              | +                             |              |          |               |                             |
| M340         | 3     | 10-9-2012 | Operation room B        | +                             |              |          |               |                             |
| M850         | -1    | 20-9-2012 | APO                     | +                             |              |          | Cooking odors | Reference to eye complaints |
| M850         | -1    | 24-9-2012 | APO                     | +                             | +            |          |               |                             |
| M850         | -1    | 14-1-2013 | APO                     | +                             | +            |          |               |                             |
| M325         | -1    | 17-1-2013 | Obstetrics              | +                             |              |          |               | Smell on entire floor       |
| M330         | 0     | 12-3-2013 | Emergency room          | +                             | +            |          |               |                             |
| M330         | 5     | 13-3-2013 | Microbiology laboratory | +                             | +            |          |               | Persistent smell            |
| M330         | 3     | 8-4-2013  | Cardiology              | +                             |              |          |               | Reference to multiple times |
| M320         | 5     | 21-5-2013 | Genetics                | +                             | +            |          |               |                             |
| M330         | 1     | 18-6-2013 | MDL                     | +                             |              |          |               |                             |
| M325         | -1    | 10-7-2013 | Obstetrics              | +                             |              |          |               | Repeated complaint          |
| M320         | 3     | 12-9-2013 | Pathology               | +                             |              |          |               | Smell nuisances             |
| M325         | -1    | 9-10-2013 | APO                     | +                             |              |          | Smoke         |                             |

<sup>a</sup>'Kerosene' is a trivial term often used by lay persons but the correct technical term is 'Jet A fuel' or 'Aviation Turbine Fuel'.

Table S2. Meteorological conditions

|              | Parameter            | Unit | Week 1 |        |        |        |        |        |        |        |        |        | Week 2 |        |        |        |        |
|--------------|----------------------|------|--------|--------|--------|--------|--------|--------|--------|--------|--------|--------|--------|--------|--------|--------|--------|
|              |                      |      | 18/03  | 19/03  | 20/03  | 21/03  | 22/03  | 23/03  | 24/03  | 25/03  | 26/03  | 27/03  | 28/03  | 29/03  | 30/03  | 31/03  | 01/04  |
| Temperature  | Average              | °C   | 8.8    | 11.8   | 13.8   | 8.0    | 6.2    | 3.9    | 4.8    | 4.6    | 4.5    | 8.5    | 10.3   | 11.0   | 12.8   | 14.3   | 13,5   |
|              | Day maximum          | °C   | 11.0   | 18.2   | 22.3   | 12.5   | 10.5   | 9.2    | 10.7   | 11.3   | 10.1   | 14.2   | 17.6   | 19.5   | 20.7   | 20.7   | 20,8   |
|              | Day minimum          | °C   | 5.2    | 7.9    | 5.0    | 3.2    | 2.1    | -0.6   | -1.2   | -2.9   | -1.7   | 1.6    | 3.3    | 1.8    | 5.0    | 8.5    | 5,8    |
| Sun          | Average              | Hour | 0.1    | 7.5    | 11.2   | 2.9    | 3.2    | 6.2    | 7.9    | 9.5    | 6.8    | 10.0   | 9.3    | 10.2   | 7.0    | 4.4    | 10     |
| RH           | Average              | %    | 84     | 71     | 58     | 82     | 80     | 87     | 79     | 73     | 78     | 67     | 66     | 63     | 62     | 61     | 69     |
| Rain         | Amount               | Mm   | 4.1    | 0.1    | 0.0    | 11.0   | 0.6    | 3.3    | 2.2    | 0.0    | 0.0    | <0.05  | 0.0    | 0.0    | 0.0    | 0.0    | 0,0    |
|              | Duration             | Hour | 3.6    | 0.2    | 0.0    | 6.1    | 0.7    | 0.8    | 3.3    | 0.0    | 0.0    | 0.0    | 0.0    | 0.0    | 0.0    | 0.0    | 0,0    |
| Wind         | Average speed        | m/s  | 5.4    | 6.3    | 5.5    | 4.0    | 4.7    | 3.4    | 1.6    | 2.3    | 1.9    | 4.8    | 4.8    | 3.1    | 2.0    | 2.9    | 1,9    |
|              | Class                | Bft  | 3      | 4      | 4      | 3      | 3      | 3      | 2      | 2      | 2      | 3      | 3      | 2      | 2      | 2      | 2      |
|              | Direction            | -    | WZW    | WZW    | ZZW    | ZW     | ZZW    | ZW     | NW     | ONO    | NO     | O      | ONO    | O      | O      | O      | WZW    |
| Air pressure | Average air pressure | hPa  | 1014.8 | 1020.9 | 1012.7 | 1007.4 | 1002.4 | 1006.3 | 1013.2 | 1011.7 | 1014.6 | 1013.2 | 1016.9 | 1018.5 | 1016.1 | 1013.9 | 1010,7 |

**Table S3.** Analysis of used fuels for 180 substances (% w/w).

| Category  | Substance                   | Jet A | Diesel | GTL |
|-----------|-----------------------------|-------|--------|-----|
| aliphatic | n-Heptane                   | 0.1   | -      | -   |
|           | 2-Methylheptane             | 0.2   | -      | -   |
|           | 3-Methylheptane             | 0.2   | -      | -   |
|           | n-Octane                    | 0.7   | 0.2    | 0.3 |
|           | n-Nonane                    | 2.7   | 0.8    | -   |
|           | 4-Methylnonane              | 0.6   | -      | 0.5 |
|           | n-Decane                    | 4.4   | 1.7    | 2.7 |
|           | n-Undecane                  | 4.7   | 1.7    | 1.6 |
|           | n-Dodecane                  | 4.1   | 1.8    | 1.7 |
|           | n-Tridecane                 | -     | 1.8    | 0.7 |
|           | N-tetradecane               |       |        | 2.1 |
|           | n-Pentadecane               | -     | 1.9    | 2.2 |
|           | n-Hexadecane                | -     | 1.6    | 1.4 |
| Cyclic    | Methylcyclohexane           | 0.2   | 0.1    | -   |
|           | trans-Decaline              | 0.6   | 0.4    | -   |
| Aromatic  | Ethylbenzene                | 0.3   | -      | -   |
|           | o-Xylene                    | 0.5   | -      | -   |
|           | n-Propylbenzene             | 0.5   | 0.1    | 0.1 |
|           | Cumene                      | 0.4   | 0.1    | -   |
|           | 3-Ethyltoluene              | 1.1   | 0.3    | 0.2 |
|           | Mesitylene                  | 1.2   | 0.5    | 0.5 |
|           | 2-Ethyltoluene              | 0.6   | 0.2    | -   |
|           | 1,2,4-tri-Methylbenzene     | 2.0   | 0.6    | -   |
|           | 1,2-diethylbenzene          | 0.6   | -      | -   |
|           | 1,2,4-trimethylbenzene      | -     | 0.2    | -   |
|           | trans-Decaline              | 0.6   | 0.4    | -   |
|           | 1,2,3,5-tetra-Methylbenzene | 0.7   | 0.3    | 0.4 |
|           | 1,2,3,4-tetra-Methylbenzene | 1.1   | 0.5    | -   |
|           | Ethylbenzene                | 0.3   | -      | -   |

**Table S4.** Weekly time-weighted average indoor and outdoor concentrations of air pollutants arranged by sample location ( $\mu\text{g}/\text{m}^3$ ).

| Substance                  | Week no. | 99.95 % efficient particle filter |                              |            |                  |                   | 80-90 % efficient particle filter |                        |               |                      |                  |                     |
|----------------------------|----------|-----------------------------------|------------------------------|------------|------------------|-------------------|-----------------------------------|------------------------|---------------|----------------------|------------------|---------------------|
|                            |          | Central sterilization             | Fertility laboratory (right) | Cardiology | Operating room 2 | Operating room 12 | Fertility laboratory (left)       | Pediatrics secretariat | Pathology Lab | Genetics Secreteriat | Microbiology Lab | Microbiology Office |
| Air filtration             |          | H13                               | H13+                         | H14        | H14              | H14               | F7/F9                             | F7/F9                  | F7/F9         | F7/F9                | F7/F9            | F7/F9               |
| Acrolein                   | 1        | 0.09                              | <0.001                       | 0.12       | <0.001           | 0.13              | <0.001                            | 0.14                   | 0.12          | 0.12                 | 0.13             | 0.08                |
|                            | 2        | 0.11                              | <0.001                       | 0.09       | <0.001           | 0.13              | 0.11                              | 0.19                   | 0.10          | 0.14                 | 0.10             | 0.10                |
| Formaldehyde               | 1        | 3.7                               | 2.7                          | 2.7        | 4.7              | 2.9               | 3.7                               | 5.2                    | 15.5          | 3.1                  | 3.3              | 3.6                 |
|                            | 2        | 4.4                               | 3.4                          | 3.5        | 5.2              | 3.4               | 2.2                               | 6.4                    | 21.7          | 2.5                  | 3.8              | 4.3                 |
| NO <sub>2</sub>            | 1 + 2    | 16.2                              | 6.3                          | 16.7       | 4.92             | 17.0              | 19.6                              | 13.6                   | 15.7          | 15.5                 | 17.4             | 17.4                |
| TVOC                       | 1        | 343                               | 50.9                         | 56.1       | 2418             | 145               | 328                               | 299                    | 928           | 56.2                 | 342              | 41.8                |
|                            | 2        | 303                               | 33.1                         | 64.5       | 2449             | 68.2              | 60.8                              | 93.7                   | 1142          | 57.8                 | 396              | 51.4                |
| PM-4.0                     | 1        | <0.01                             | 0.5                          | 2.7        | <0.01            | 1.5               | 1.5                               | 2.5                    | 2.5           | 3.9                  | 4.4              | 3.6                 |
|                            | 2        | <0.01                             | <0.1                         | 1.0        | <0.01            | 1.0               | 3.9                               | 6.9                    | 6.9           | 7.9                  | 9.4              | 6.9                 |
| Benz[a]pyrene <sup>b</sup> | 1        | <0.3                              | <0.3                         | <0.3       | <0.3             | <0.3              | 34                                | 61                     | 24            | 35                   | 39               | 33                  |
|                            | 2        | <0.3                              | <0.3                         | <0.3       | <0.3             | <0.3              | 46                                | 68                     | 37            | 55                   | 61               | 59                  |

<sup>a</sup> No result due to technical difficulties (DNPH impregnated adsorbent material was wetted due to heavy rainfall); <sup>b</sup> B[a]P was analyzed from an extract of PM-4.0 and expressed as  $\text{pg}/\text{m}^3$ ; F7 = filter with efficiency of 80-90 % for particles of 0.4  $\mu\text{m}$ ; F9 = filter with efficiency of > 90 % for particles of 0.4  $\mu\text{m}$ ; H13 = high efficiency filter with overall efficiency of 99.95 % for particles; H13+ = as H13 with activated carbon; H14 = high efficiency filter with overall efficiency of 99.95 %.

[illegible]

| Week number | Substance<br>(P50 - P90 – GV <sup>a</sup> ) | Central Sterilisation | Operating room 12 | Operating room 2 | Fertility laboratory<br>(left) | Fertility laboratory<br>(right) | Sec.retariat Pediatrics | Pathology Laboratory | Secretariate Genetics | Cardiology | Microbiology<br>Laboraotry | Microbiology office | Helicopter platform<br>(indoor) | Helicopter platform<br>(outdoor) | Dentistry Building<br>(indoor) | Dentistry Building<br>(outdoor) | Kindergarten (indoor) | Kindergarten<br>(outdoor) |
|-------------|---------------------------------------------|-----------------------|-------------------|------------------|--------------------------------|---------------------------------|-------------------------|----------------------|-----------------------|------------|----------------------------|---------------------|---------------------------------|----------------------------------|--------------------------------|---------------------------------|-----------------------|---------------------------|
| 1           | 2-Methylbutane                              |                       |                   |                  |                                |                                 |                         |                      |                       |            |                            |                     |                                 |                                  | 4.2                            |                                 | 2.8                   |                           |
| 2           |                                             |                       |                   |                  |                                |                                 |                         |                      |                       |            |                            |                     |                                 |                                  |                                |                                 | 2.2                   |                           |
| 1           | Methylethylketon                            |                       |                   |                  |                                |                                 |                         |                      |                       |            | 4.0                        |                     | 2.9                             |                                  |                                |                                 |                       |                           |
| 2           | (4.1 – 33.4 – 33)                           |                       |                   |                  |                                |                                 |                         |                      |                       |            | 3.2                        |                     | 3.4                             |                                  |                                |                                 |                       |                           |
| 1           | 2-Methylpentane                             | 99.3                  |                   |                  |                                |                                 |                         |                      |                       |            |                            |                     | 3.3                             |                                  |                                |                                 |                       |                           |
| 2           | (1.0 – 7.0 – 7.0)                           | 72.6                  |                   |                  |                                |                                 |                         |                      |                       |            |                            |                     | 4.7                             |                                  |                                |                                 |                       |                           |
| 1           | 3-Methylpentane                             | 24.1                  |                   |                  |                                |                                 |                         |                      |                       |            |                            |                     |                                 |                                  |                                |                                 |                       |                           |
| 2           | (<1 – 1.3 – 1.3)                            |                       |                   |                  |                                |                                 |                         |                      |                       |            |                            |                     |                                 |                                  |                                |                                 |                       |                           |
| 1           | n-Octane                                    |                       |                   |                  |                                |                                 |                         | 28.4                 |                       |            |                            |                     |                                 |                                  |                                |                                 |                       |                           |
| 2           | (1.0 – 5.0 – 5.0)                           |                       |                   |                  |                                |                                 |                         | 37.7                 |                       |            |                            |                     |                                 |                                  |                                |                                 |                       |                           |
| 1           | n-Pentane                                   | 136.2                 |                   |                  |                                |                                 | 1.6                     | 1.7                  |                       |            |                            | 1.6                 | 4.3                             |                                  |                                | 1.6                             | 2.6                   |                           |
| 2           |                                             | 98.7                  |                   |                  |                                |                                 |                         |                      | 1.9                   |            |                            | 4.1                 | 4.8                             |                                  |                                |                                 | 2.0                   |                           |
| 1           | Toluene                                     |                       |                   |                  | 32.9                           | 23.9 <sup>b</sup>               | 29.5                    |                      |                       |            | 2.4                        |                     | 2.8                             |                                  |                                |                                 | 32.5                  |                           |
| 2           | (7.0 – 30.0 – 30)                           |                       |                   |                  |                                |                                 |                         |                      |                       |            |                            |                     | 4.4                             |                                  | 1.9                            |                                 |                       |                           |
| 1           | n-Undecane                                  |                       |                   |                  |                                |                                 |                         |                      |                       |            |                            |                     |                                 |                                  |                                |                                 |                       |                           |
| 2           | (2.0 – 14.0 – 14)                           |                       |                   |                  |                                |                                 |                         |                      |                       |            |                            |                     |                                 |                                  |                                |                                 | 2.1                   |                           |
| 1           | m-Xylene                                    |                       |                   |                  |                                |                                 |                         |                      |                       |            |                            |                     |                                 |                                  |                                |                                 |                       |                           |
| 2           | (3.0 – 29.0 – 29)                           |                       |                   |                  | 2.8                            |                                 |                         | 67.0                 |                       |            |                            |                     |                                 |                                  |                                |                                 |                       |                           |
| 1           | o-Xylene                                    |                       |                   |                  |                                |                                 |                         | 27.0                 |                       |            |                            |                     |                                 |                                  |                                |                                 |                       |                           |
| 2           | (1.0 – 9.0 – 9.0)                           |                       |                   |                  | 1.7                            |                                 |                         | 31.2                 |                       |            |                            |                     |                                 |                                  |                                |                                 |                       |                           |
| 1           | p-Xylene                                    |                       |                   |                  |                                |                                 |                         |                      |                       |            |                            |                     |                                 |                                  |                                |                                 |                       |                           |
| 2           | (3.0 – 29.0 – 29)                           |                       |                   |                  |                                |                                 |                         | 30.3                 |                       |            |                            |                     |                                 |                                  |                                |                                 |                       |                           |

<sup>a</sup> Source: 0.50 percentile and 0.90 percentile values and guidance value (Source: Arbeitsgemeinschaft ökologischer Forschungsinstitute (AGöF)); <sup>b</sup> Possible underestimation of the real concentration as indicated by presence of a substantial amount on the back-up section of the adsorbent tube.

**Table S6.** VOC concentrations ( $\mu\text{g}/\text{m}^3$ ) in operating rooms prior and during test runs of power supply (only results of detected substances are presented).

| Substance                            | Operating room 4 (1 <sup>e</sup> floor) |                       | Operating room B (3 <sup>e</sup> floor) |                       | At source | Office air reference <sup>d</sup> |
|--------------------------------------|-----------------------------------------|-----------------------|-----------------------------------------|-----------------------|-----------|-----------------------------------|
|                                      | Background                              | Test run <sup>b</sup> | Background                              | Test run <sup>b</sup> |           |                                   |
| Acetone                              | 17                                      | 19                    | 22                                      | 14                    | 60        | 161                               |
| Acrolein                             | <14                                     | <14                   | <14                                     | <14                   | 42        | <5                                |
| Benzene                              | <1                                      | <1                    | <1                                      | <1                    | 23        | 3                                 |
| Ethanol                              | 96.0                                    | 118                   | <30                                     | <30                   | <30       | - <sup>e</sup>                    |
| Ethylbenzene                         | <2                                      | <2                    | <2                                      | <2                    | 10        | 10                                |
| 1-Ethyl-4-Methylbenzene <sup>a</sup> | <2                                      | <2                    | <2                                      | <2                    | 3         | 3.0                               |
| 1,2,4-tri-Methylbenzene <sup>a</sup> | <2                                      | <2                    | <2                                      | <2                    | 14        | 11                                |
| 1,3,5-tri-Methylbenzene              | <2                                      | <2                    | <2                                      | <2                    | 4         | 3.0                               |
| Naphtalene                           | <1                                      | <1                    | <1                                      | <1                    | 19        | 1.2                               |
| iso-Propanol                         | 63                                      | 92.0                  | 98                                      | 118                   | 6         | 91                                |
| Propene                              | <3                                      | <3                    | <3                                      | <3                    | 63        | - <sup>e</sup>                    |
| Toluene                              | <4                                      | <4                    | <4                                      | <4                    | 10        | 30                                |
| m/p-Xylene                           | <3                                      | <3                    | <3                                      | <3                    | 13        | 29                                |
| o-Xylene                             | <2                                      | <2                    | <2                                      | <2                    | 7         | 9.0                               |

<sup>a</sup> Substance observed as a fuel component; <sup>b</sup> Air sampling of 2 h prior to test run; <sup>c</sup> Air sampling of 2 h started when the engines were started up. The test run continued for 45 min; <sup>d</sup> P<sub>90</sub> value of office air measurements in Germany in the period 2006-2012 (source: [http://agoef.de/agoef/oewerte/orientierungswerte\\_englisch.html](http://agoef.de/agoef/oewerte/orientierungswerte_englisch.html)) <sup>e</sup> No reference value available.

**Table S7.** Registration of complaints during the study period.

| Location        | Central Sterilisation | Fertility Laboratory (left) | Pathology    | Fertility Laboratory (left) |
|-----------------|-----------------------|-----------------------------|--------------|-----------------------------|
| Date            | 18-03-2014            | 21-03-2014                  | 10-06-2014   | 20-06-2014                  |
| Location number | M850.-1.23            | M325.-1.206                 | M320.03.009  | M325.-1.206                 |
| Time            | 12:48                 | 12:55                       | 16:35        | 11:40                       |
| Intensity       | 4/5                   | 4/5                         | 2/5          | 4/5                         |
| Duration (min)  | 1-5                   | 20                          | Not reported | Not reported                |
| Description     | Kerosene fume         | Diesel fume                 | Exhaust fume | Diesel fume                 |
| Complaints      | Airway complaints     | Irritation nose/throat      | Not reported | Not reported                |

**Table S8.** Helicopter flights during study period.

| Date (day-month<br>year) | Time (hh:mm) | Helicopter ID  | Description of flight                |
|--------------------------|--------------|----------------|--------------------------------------|
| 18-03-14                 | 12:15        | - <sup>a</sup> | Three persons from Zevenaar          |
| 18-03-14                 | 18:35        | PH-HVB         | Five persons from Hedel              |
| 19-03-14                 | 18:02        | PH-HVB         | Pick up of physician from Oss        |
| 20-03-14                 | 20:07        | PH-HVB         | Patient transport from Vredepeel     |
| 24-03-14                 | 01:50        | PH-HVB         | Patient transport from Maarne-Kessel |
| 24-03-14                 | 23:06        | PH HVB         | Pick up of physician                 |
| 25-03-14                 | 08:58        | PH-HVB         | Pick up of physician                 |
| 26-03-14                 | 11:40        | PH-HVB         | Pick up of physician                 |
| 28-03-14                 | 11:00        | PH-HVB         | Patient transport                    |
| 29-03-14                 | 02:10        | PH-ELP         | Pick up of physician                 |
| 29-03-14                 | 18:25        | PH-HVB         | Patient transport                    |
| 29-03-14                 | 22:17        | PH-HVB         | Pick up of physician                 |
| 31-03-14                 | 04:53        | PH-MAA         | Pick up of physician from Amsterdam  |
| 01-04-14                 | 12:00        | PH-HVB         | Pick up of physician                 |

<sup>a</sup> Unknown

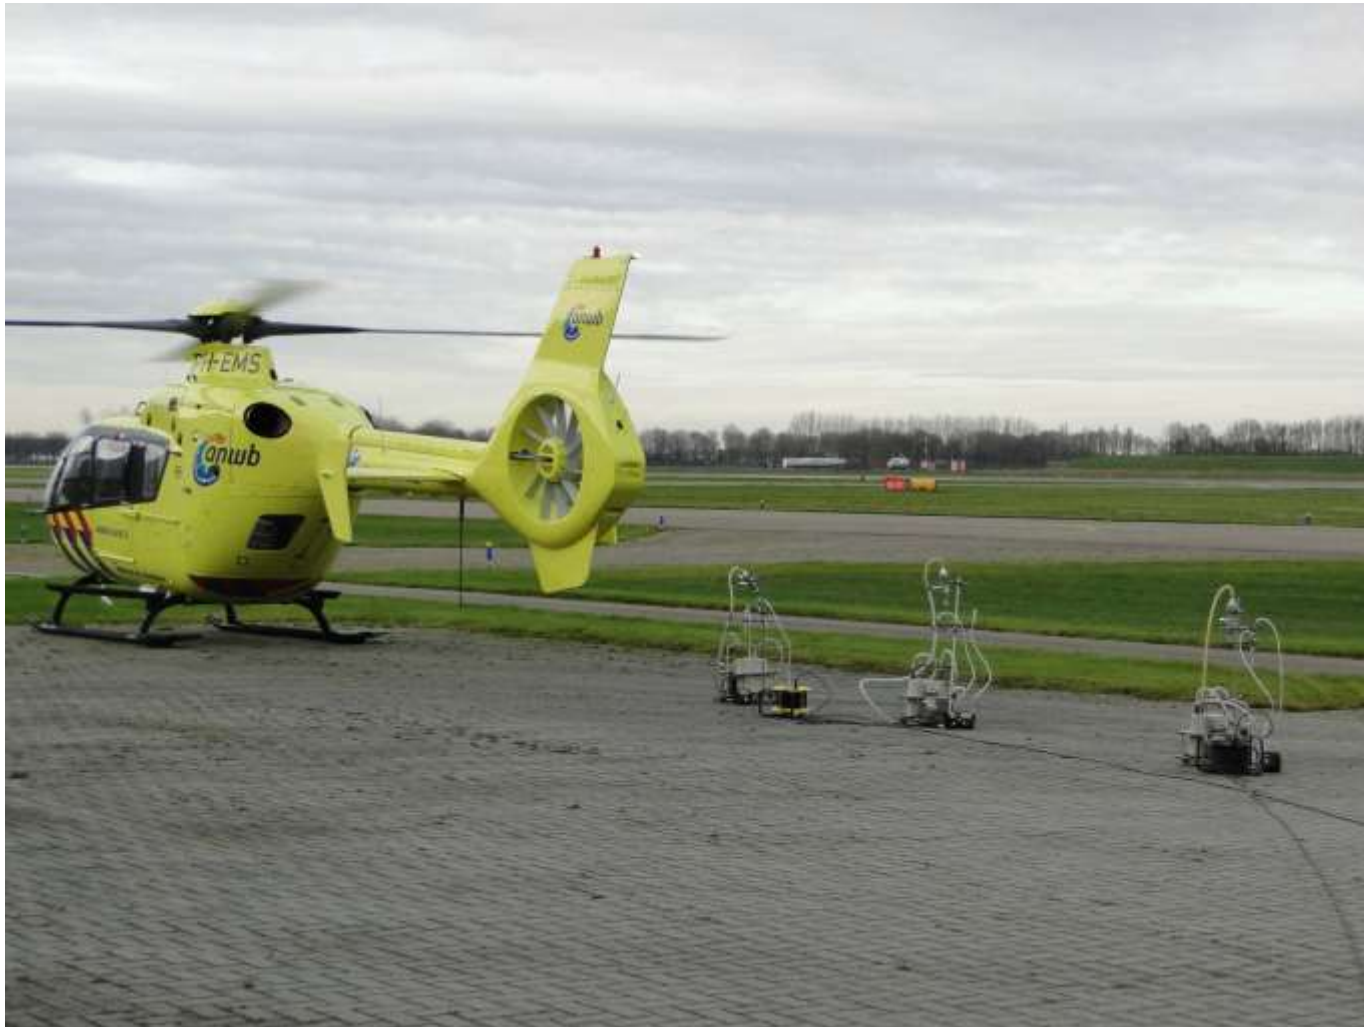

Figure S1: Helicopter emission measurement at the airport in Lelystad.

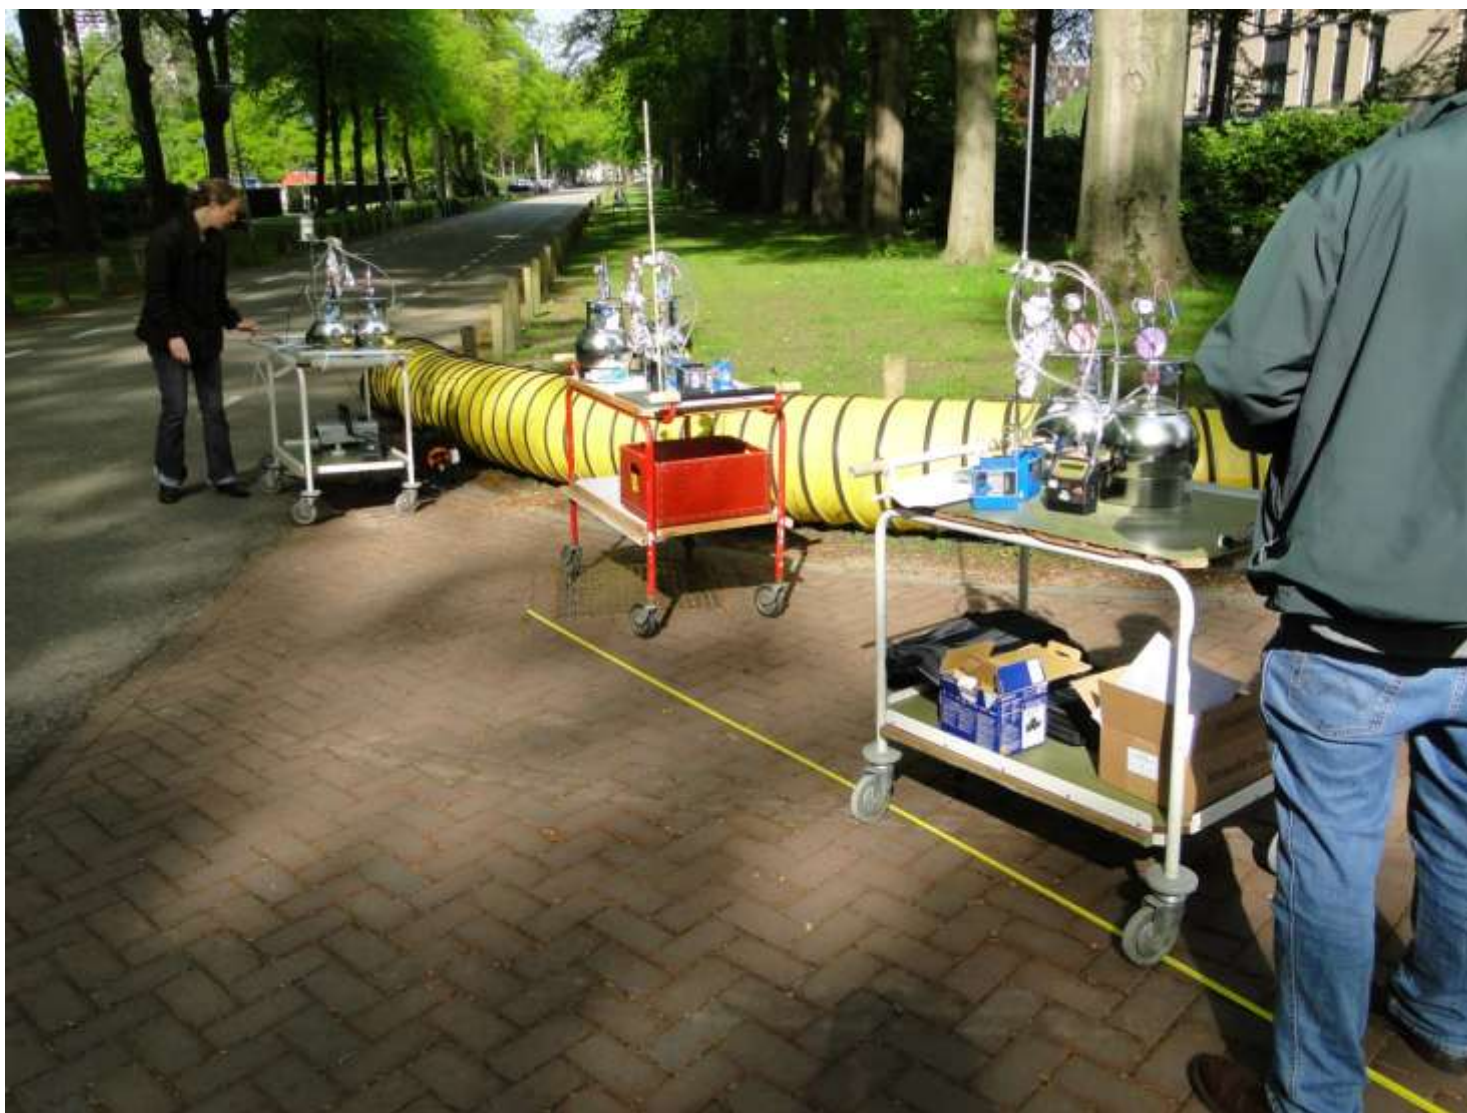

Figure S2: Set-up for emission measurements at the emission point of the power supply (end of yellow tube). The photograph was taken before the engine was started.

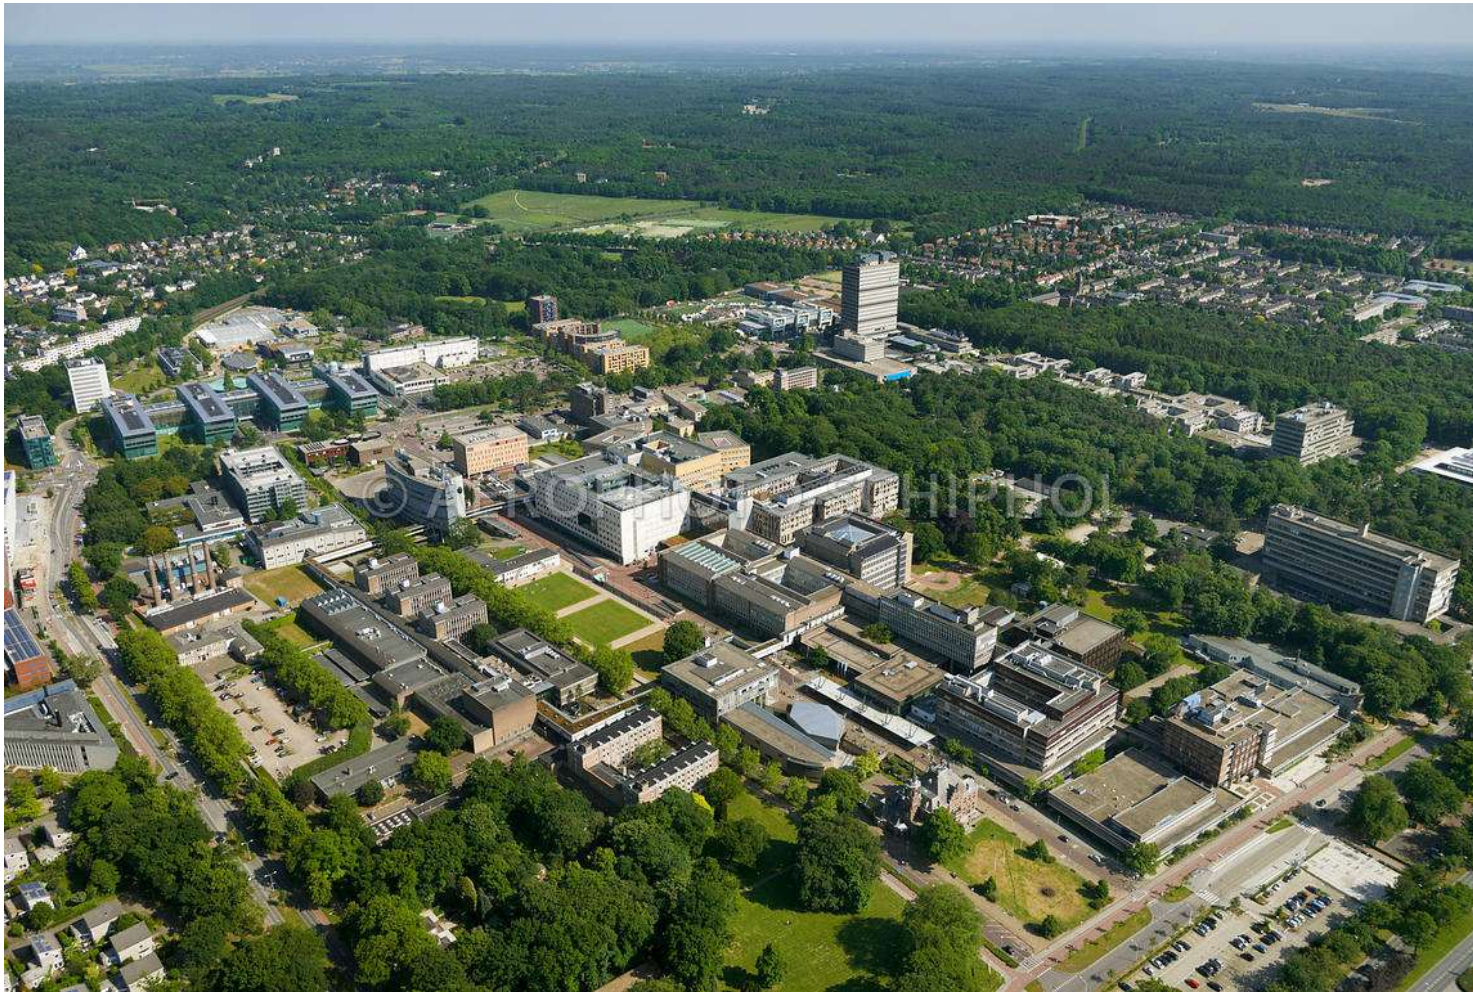

Figure S3: Bird's view of Radboud university with teaching hospital on May 18<sup>th</sup> 2014, Photo by Marco van Middelkoop, Aerophoto Schiphol.

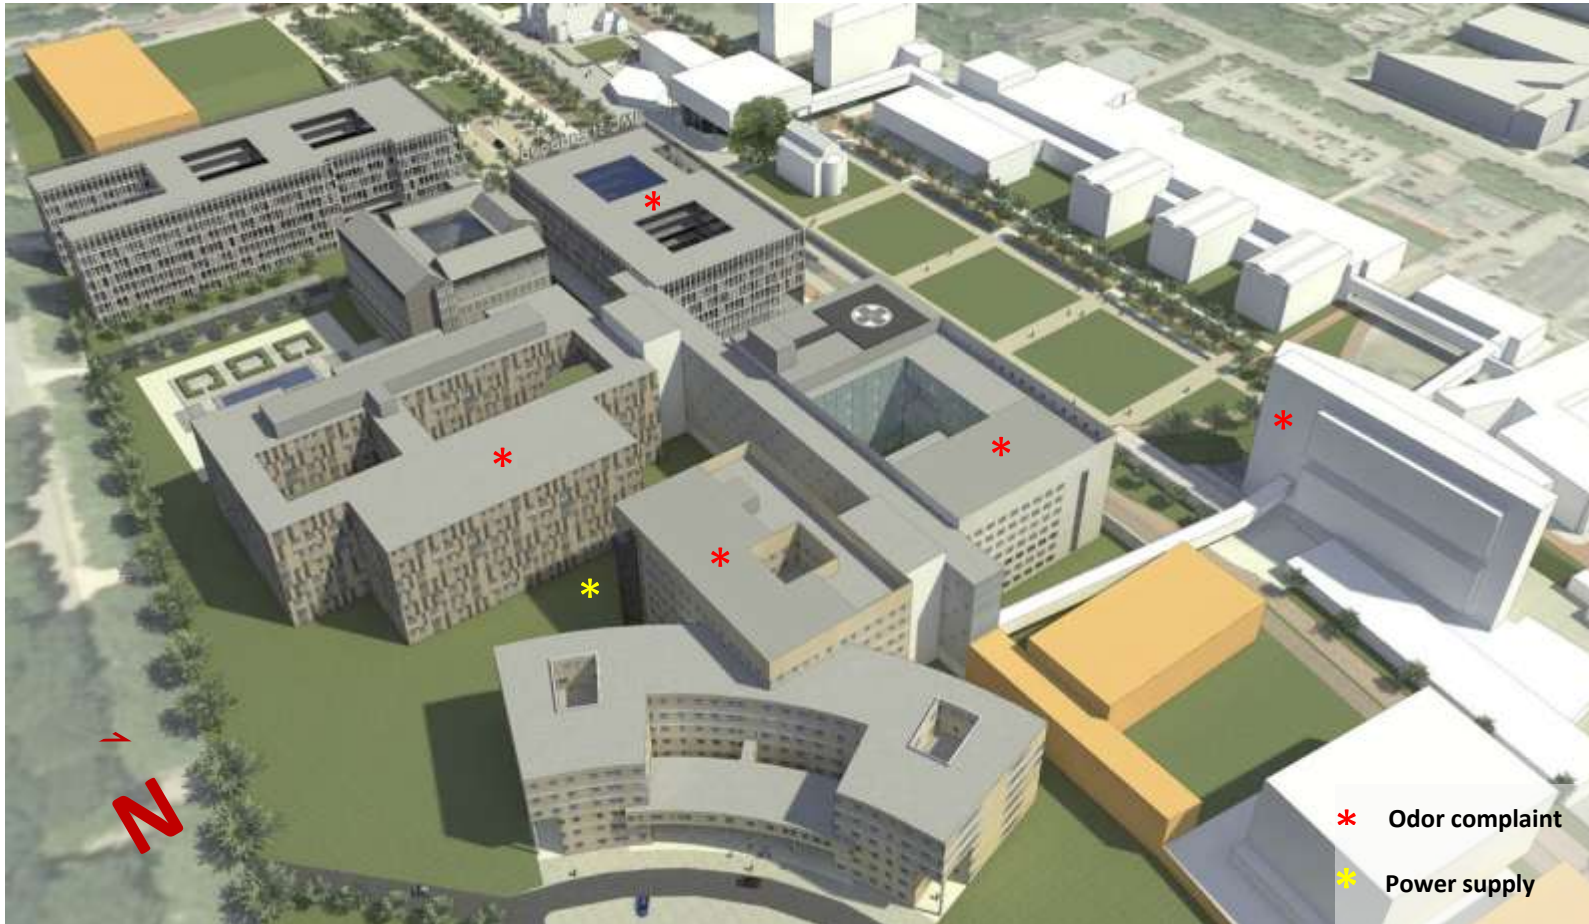

Figure S4: View on helicopter landing platform on the roof of the Radboudumc hospital (grey cross), indicated with a cross (source: [www.egm.nl](http://www.egm.nl)). Compass north is indicated by N ➤. Buildings with registered odor complaints are indicated by a red star. The location of the power supply is indicated by a yellow star.

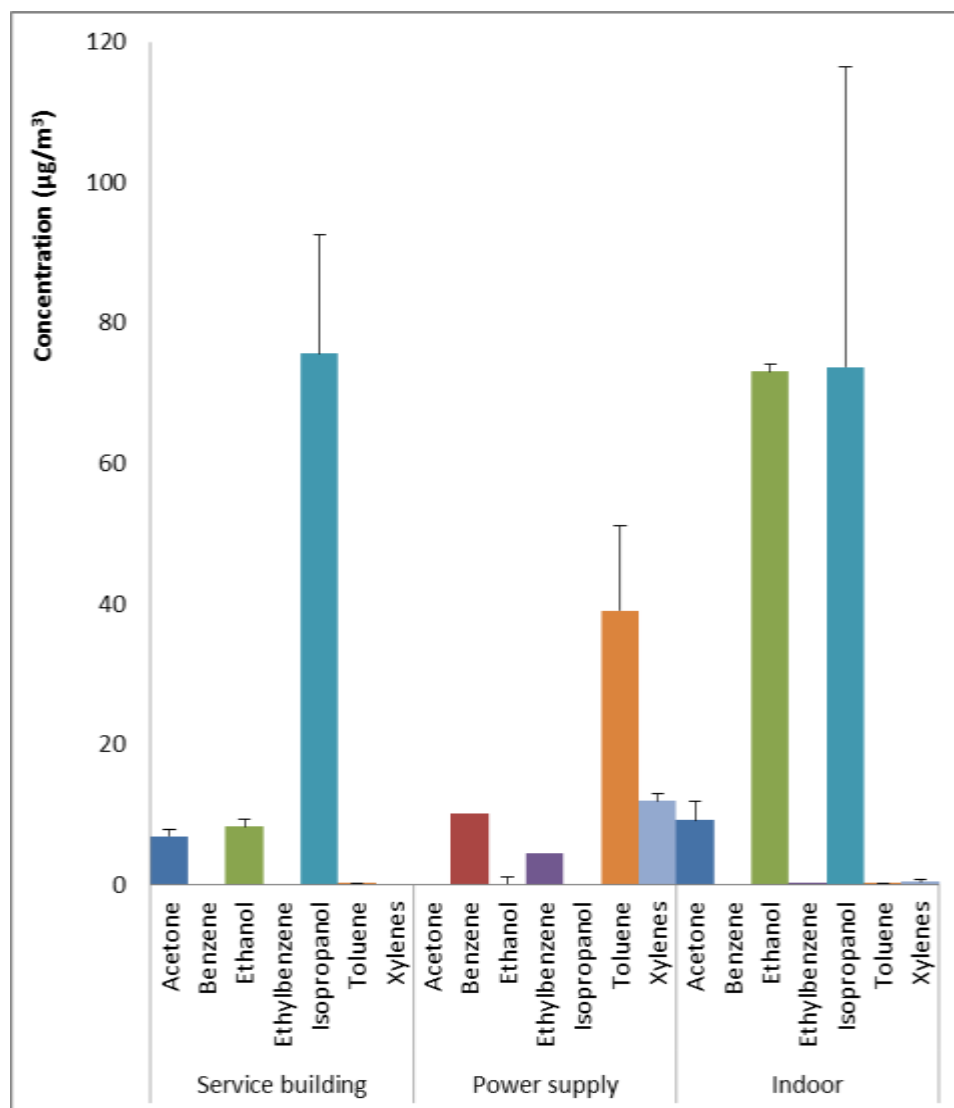

Figure S5: Comparison of VOC profiles from outdoor sources with VOC profile from grab sample collected by persons who reported an odor complaints. Observations in triplicate (mean  $\pm$  sd).
